# Supplementary material for: Narrow-band near-infrared photocurrent enhancement via toroidal dipole resonance in Si1−xGex nanodisk arrays
Source: Royal Society of Chemistry journal article supplement (doi:10.1039/d6na00324a), 2026-05-08
Supplement: d6na00324a1.pdf [file d6na00324a1.pdf]

## Supporting information

### **Narrow-Band Near-Infrared Photocurrent Enhancement via Toroidal Dipole Resonance in $\text{Si}_{1-x}\text{Ge}_x$ Nanodisk Array**

Nguyen Quoc Chien, Keisuke Moriasa, Hiroshi Sugimoto, and Minoru Fujii.

Department of Electrical and Electronic Engineering, Graduate School of Engineering,  
Kobe University, Kobe 657-8501, Japan

E-mail: sugimoto@eedept.kobe-u.ac.jp

fujii@eedept.kobe-u.ac.jp

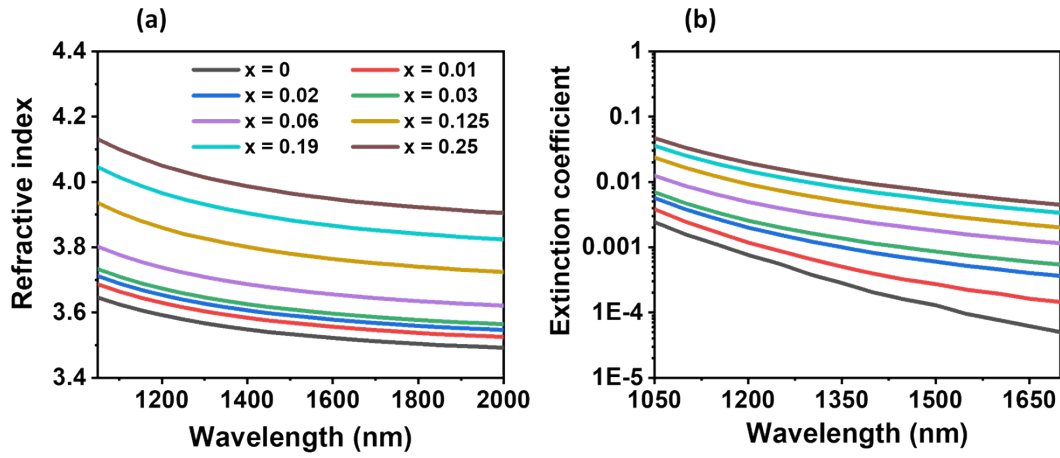

**Figure S1.** (a) Refractive index and (b) extinction coefficient of Si<sub>1-x</sub>Ge<sub>x</sub> alloy with x ranging from 0 to 0.375. The data are obtained from DFT-based SIESTA calculations using large grain-boundary supercells, which represent the polycrystalline structure by incorporating atomic disorder and local bonding variations at the grain interfaces.

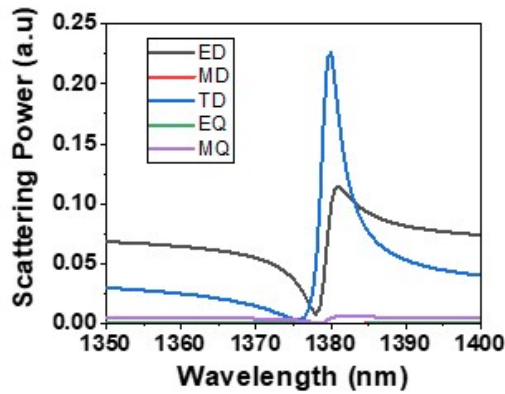

**Figure S2.** Scattering power spectra of Cartesian ED, MD, MQ, and TD moments obtained by multipole decomposition of the induced current in the nanodisk array in Figure 1.

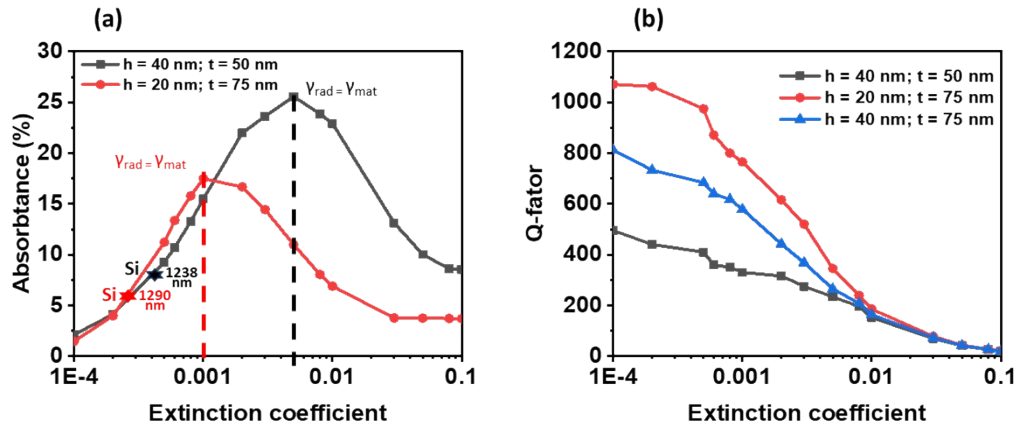

**Figure S3.** (a) Absorbance at the resonance peak as a function of extinction coefficient for two geometries:  $h = 40$  nm,  $t = 50$  nm (black), and  $h = 20$  nm,  $t = 75$  nm (red), with  $n = 3.5$ ,  $P = 750$  nm, and  $D = 700$  nm. (b) Q-factor of the peak as a function of extinction coefficient for three geometries: when  $h = 40$  nm,  $t = 50$  nm (black),  $h = 20$  nm,  $t = 75$  nm (red), and  $h = 40$  nm,  $t = 75$  nm (blue), with  $n = 3.5$ ,  $P = 750$  nm and  $D = 700$  nm.

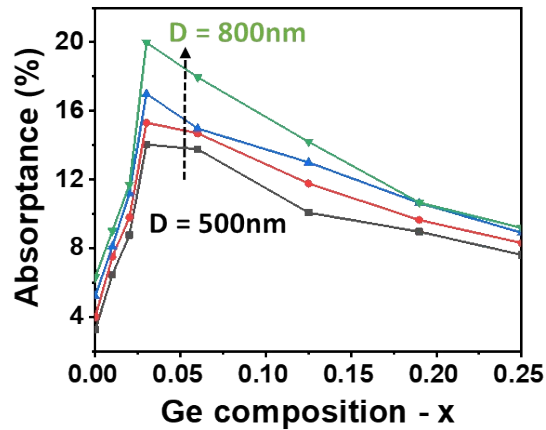

**Figure S4.** Absorbance at the resonance peak of  $\text{Si}_{1-x}\text{Ge}_x$  nanodisk arrays for composition  $x$  ranging from 0 to 0.25, when the disk diameter ( $D$ ) varies from 500 nm to 800 nm. Other parameters are fixed at  $h = 40$  nm,  $t = 50$  nm, and  $P = D + 50$  nm.

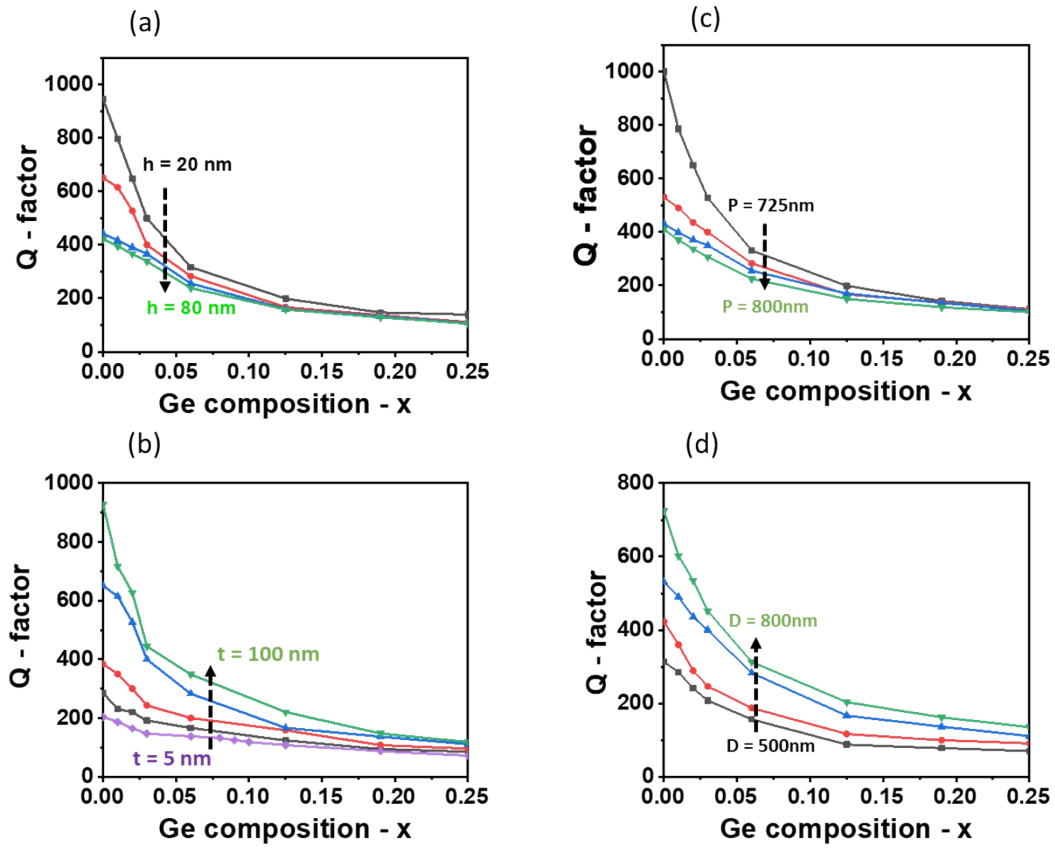

**Figure S5.** Q-factor of the resonance peak for the following geometries: (a) Disk height ( $h$ ) varying from 20 nm to 80 nm, with  $P = 750$  nm,  $D = 700$  nm, and  $t = 75$  nm. (b) Thin-film thickness ( $t$ ), varying from 5 nm to 100 nm, with  $h = 40$  nm,  $P = 750$  nm, and  $D = 700$  nm. (c) Period ( $P$ ), varying from 725 nm to 800 nm, with  $h = 40$  nm,  $D = 700$  nm, and  $t = 75$  nm. (d) Disk diameter ( $D$ ), varying from 500 nm to 800 nm, with  $h = 40$  nm,  $t = 50$  nm, and  $P = D + 50$  nm.

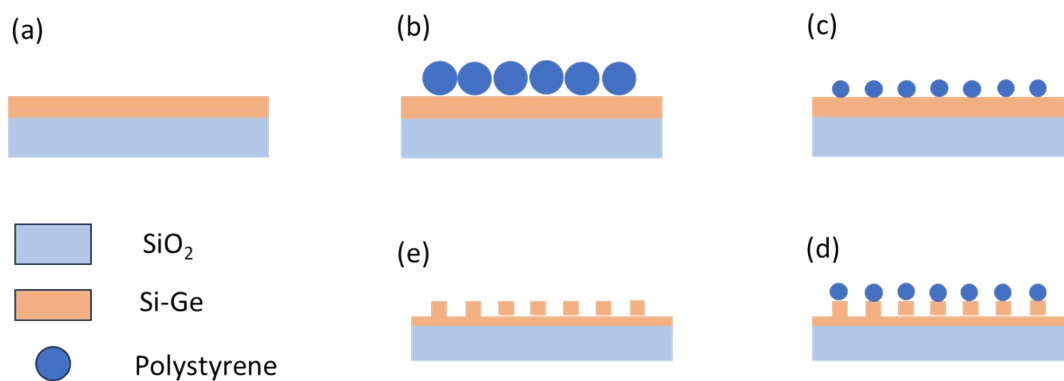

**Figure S6.** Schematic illustration of the fabrication process of  $\text{Si}_{1-x}\text{Ge}_x$  nanodisk array. A monolayer of polystyrene beads is formed on a sputter-deposited  $\text{Si}_{1-x}\text{Ge}_x$  film. The polystyrene beads are then etched by oxygen plasma until the diameter is reduced to a desired value. The polystyrene beads are used as a photomask for  $\text{Ar}^+$ -etching of the  $\text{Si}_{1-x}\text{Ge}_x$  film. Finally, polystyrene beads are removed by toluene.

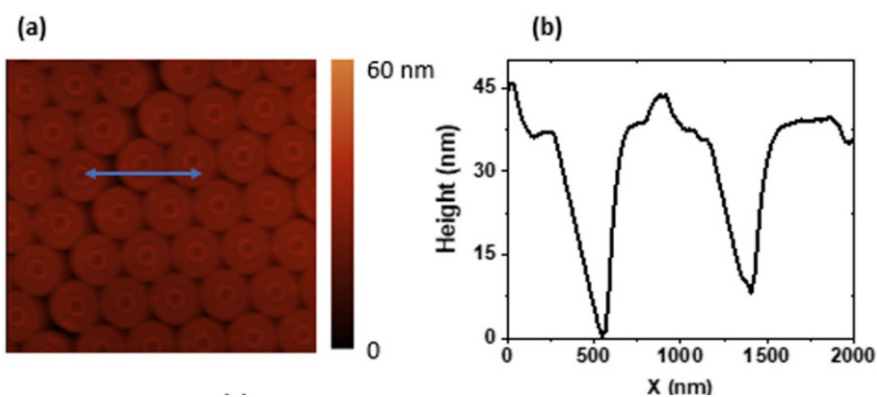

**Figure S7.** (a) AFM image and (b) the height profile along the arrow in (a) of fabricated  $\text{Si}_{1-x}\text{Ge}_x$  nanodisk array.

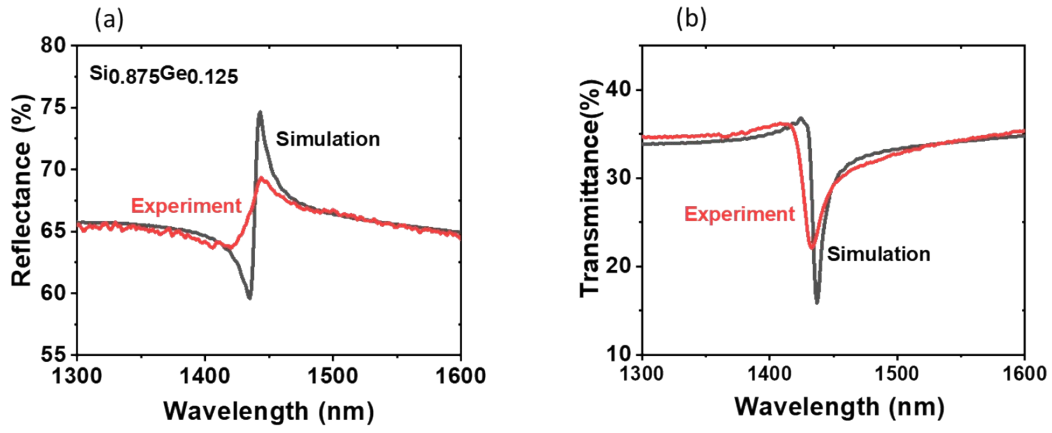

**Figure S8.** Measured (red) and calculated (black) (a) reflectance and (b) transmittance spectra of  $\text{Si}_{0.875}\text{Ge}_{0.125}$  nanodisk array.

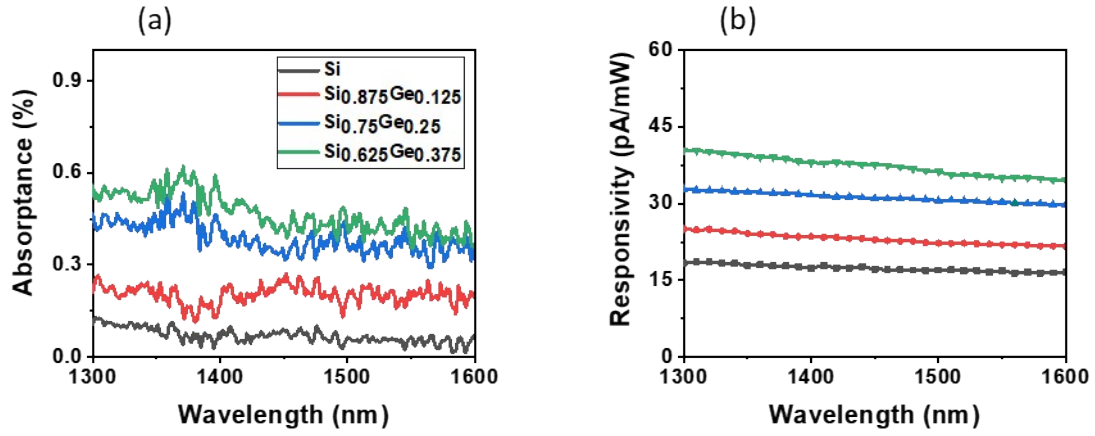

**Figure S9.** (a) Absorbance and (c) photo responsivity spectra of flat films of  $\text{Si}_{1-x}\text{Ge}_x$  array with  $x$  ranging from 0 to 0.375. The films thickness is fixed to 115 nm.

### Estimation of Germanium composition in Si<sub>1-x</sub>Ge<sub>x</sub> alloy

Figure S10 shows the Raman scattering spectra of Si<sub>1-x</sub>Ge<sub>x</sub> alloy thin films with different x. Three characteristic peaks corresponding to the Si-Si, Si-Ge, and Ge-Ge vibrational modes are observed. We estimated the composition from the x-dependent shift of the Si-Si peak ( $\Delta\omega_{\text{Si-Si}}$ ) using the following equation [1]:

$$\Delta\omega_{\text{Si-Si}} = -50.6x - 23.74x^2$$

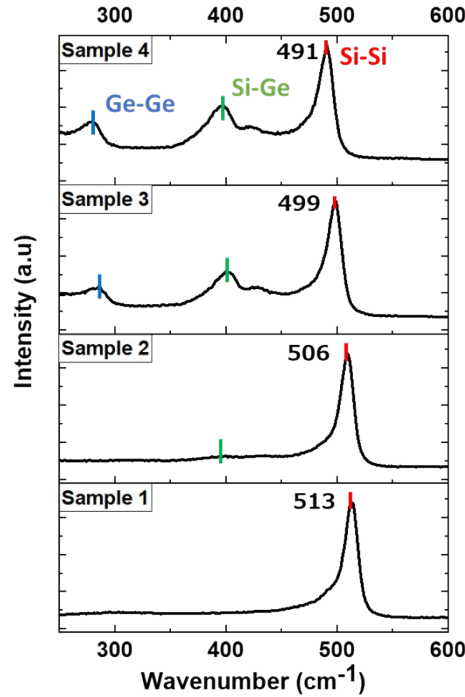

**Figure S10.** Raman scattering spectra of Si<sub>1-x</sub>Ge<sub>x</sub> alloy thin films with different x. The composition x is estimated from the shift of the Si-Si peak.

### Reference

- [1] Denis, R. *et al.* Germanium content and strain in Si<sub>1-x</sub>Ge<sub>x</sub> alloys characterized by Raman spectroscopy. *Journal of Crystal Growth* **392**, 66-73 (2014).
